# Supplementary material for: A Role for Human DNA Polymerase λ in Alternative Lengthening of Telomeres
Source: PubMed Central journal article supplement (PMC7956399; doi:10.3390/ijms22052365), 2021-02-27
Supplement: ijms-22-02365-s001.pdf [file ijms-22-02365-s001.pdf]

Supplementary Information to the manuscript:

## A role for human DNA polymerase $\lambda$ in alternative lengthening of telomeres

Elisa Mentegari <sup>1#</sup>, Federica Bertoletti <sup>1#</sup>, Miroslava Kissova <sup>1#†</sup>, Elisa Zucca <sup>1</sup>, Silvia Galli <sup>1</sup>, Giulia Tagliavini <sup>1</sup>, Anna Garbelli <sup>1</sup>, Antonio Maffia <sup>1</sup>, Silvia Bione <sup>1</sup>, Elena Ferrari <sup>2</sup>, Fabrizio d'Adda di Fagagna <sup>1,3</sup>, Sofia Francia <sup>1</sup>, Simone Sabbioneda <sup>1</sup>, Lih-Yow Chen <sup>4</sup>, Joachim Lingner <sup>4</sup>, Valerie Bergoglio <sup>5</sup>, Jean-Sebastien Hoffmann <sup>6</sup>, Ulrich Hübscher <sup>2</sup>, Emmanuele Crespan <sup>1\*‡</sup> and Giovanni Maga <sup>1\*‡</sup>

<sup>1</sup> Institute of Molecular Genetics IGM-CNR "Luigi Luca Cavalli-Sforza", via Abbiategrasso 207, I-27100 Pavia (Italy); federica.bertoletti@igm.cnr.it (FB); miroslava.kissova@ntnu.no (MK), mentegari@igm.cnr.it (EM); elisa.zucca83@gmail.com (EZ); silvia.galli@cruk.cam.ac.uk (SG); g.tagliavini@sms.ed.ac.uk (GT); anna.garbelli@igm.cnr.it (AG); antonio.maffia@berkeley.edu (AM); bione@igm.cnr.it (SB); elena.ferrari@dmmd.uzh.ch (EF); fabrizio.dadda@ifom.eu (FAF); emmanuele.crespan@igm.cnr.it (EC); giovanni.maga@igm.cnr.it (GM)

<sup>2</sup> Department of Molecular Mechanisms of Disease, University of Zürich-Irchel, Winterthurerstrasse 190, CH-8057 Zürich (Switzerland); elena.ferrari@dmmd.uzh.ch (EF); hubscher@uzh.ch (UH)

<sup>3</sup> IFOM-The FIRC Institute of Molecular Oncology, Milan 20139 (Italy)

<sup>4</sup> Swiss Institute for Experimental Cancer Research (ISREC), School of Life Sciences, Frontiers in Genetics National Center of Competence in Research, Ecole Polytechnique Fédérale de Lausanne (EPFL), Station 19, CH-1015 Lausanne (Switzerland). lyowchen@gate.sinica.edu.tw (L-YC); joachim.lingner@epfl.ch (JL)

<sup>5</sup> UMR1037 INSERM, Cancer Research Center of Toulouse, 2 Avenue Curien, 31037 Toulouse (France); valerie.bergoglio@inserm.fr

<sup>6</sup> Laboratoire d'Excellence Toulouse Cancer (TOUCAN), Laboratoire de Pathologie, Institut Universitaire du Cancer-Toulouse, Oncopole, 1 avenue Irène-Joliot-Curie, 31059 Toulouse Cedex, France ; jean-sebastien.hoffmann@inserm.fr

\* Correspondence: giovanni.maga@igm.cnr.it (GM); emmanuele.crespan@igm.cnr.it (EC)

# These authors contributed equally to this work.

† Present address: Institute of Clinical and Molecular Medicine, Norwegian University of Science and Technology, Erling Skjalgssons gt 1, 7491 Trondheim, Norway

‡ These authors should be considered joint senior authors.

### Contents:

Supplementary Figure Legends for Figures S1-S8

## Supplementary Figures S1-S8

### Supplementary Figure Legends

**Supplementary Figure S1. A.** MMST DNA synthesis by Pol  $\lambda$  in the presence of different combinations of dNTPs and in the presence of both the donor and acceptor strands (lanes 3 - 9) or with the donor strand alone (lanes 10-14). Lane 1, labelled 25 mer donor alone; lane 2, control reaction in the absence of dNTPs. **B.** Pol  $\lambda$  was incubated in the presence of dNTPs, (either single or in combination) with the 5'-labelled dideoxy-terminated 16/48 acceptor template. Lane 1, 16 mer labelled oligonucleotide alone; lane 2, control reaction in the absence of dNTPs. **C.** MMST DNA synthesis by Pol  $\beta$  in the absence (lane 1) or in the presence (lanes 2-4) of different concentrations of RP-A and in the presence of the 5'-labelled donor strand and the dideoxy terminated 16/48mer acceptor template. Lane 5, control reaction with Pol  $\lambda$ . **D.** Titration of the five telomeric repeats 5xtel (lanes 1-5) or the single telomeric repeat (lanes 6-10) dideoxy terminated 16/48mer acceptor templates, in the presence of 50 nM Pol  $\lambda$ , RP-A and dGTP.

**Supplementary Figure S2. A.** Confocal microscopy imaging of Pol  $\lambda$  colocalization with TERRA RNA in Saos-2 cells ectopically expressing c-Myc Pol  $\lambda$  and the corresponding statistical analysis. The white arrow shows a representative colocalization event. **B.** Confocal microscopy imaging of Pol  $\lambda$  and TERRA foci in Saos-2 cells either transfected with the control empty vector (top and mid lane) or with the vector ectopically expressing c-Myc Pol  $\lambda$

(bottom lane), untreated (top lane) or treated with RNase A before staining (mid and bottom lanes).

**Supplementary Figure S3.** Original uncropped images of the western blots shown in Fig.1A, lanes 1-4.

**Supplementary Figure S4.** Original uncropped images of the western blots shown in Fig.1A, lanes 5-6.

**Supplementary Figure S5.** Original image of the western blots shown in Fig.2H, lanes 1-2. area shown in Figure 2H is boxed.

**Supplementary Figure S6.** Original uncropped image of the gel shown in Fig. 4G, lanes 1-6. The area between the solid lines was cropped out in Fig. 4G. The omitted lanes represent another Pot1/TTP1 titration with a lower Pol  $\lambda$  concentration.

**Supplementary Figure S7.** Original uncropped image of the gel shown in Fig.4 H, lanes 1-8.

**Supplementary Figure S8.** Original uncropped image of the gel shown in Fig.4 E.

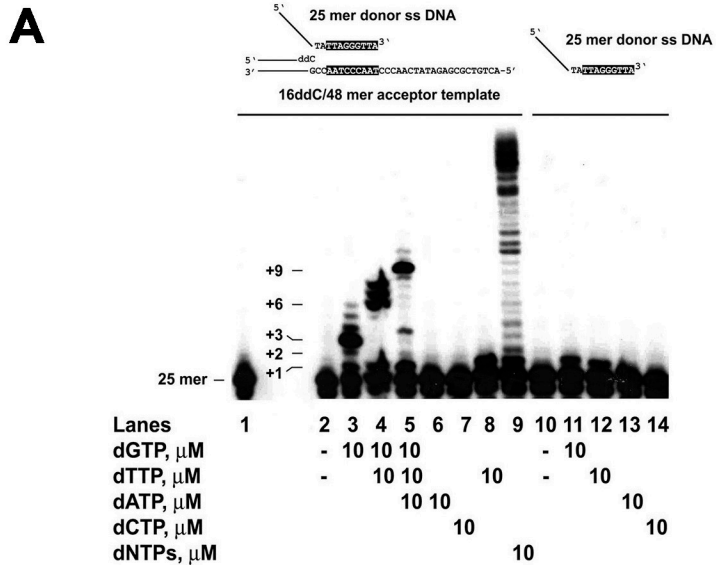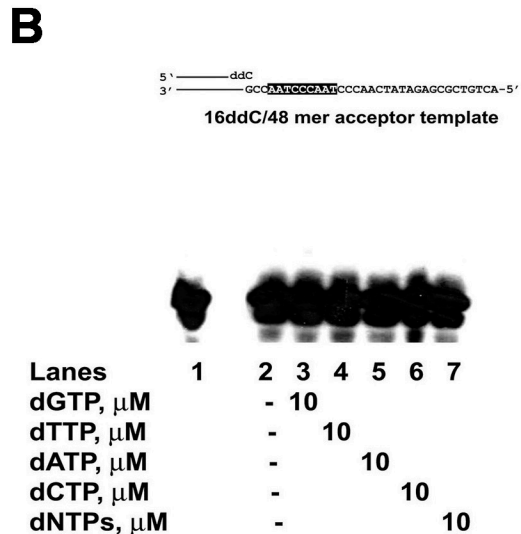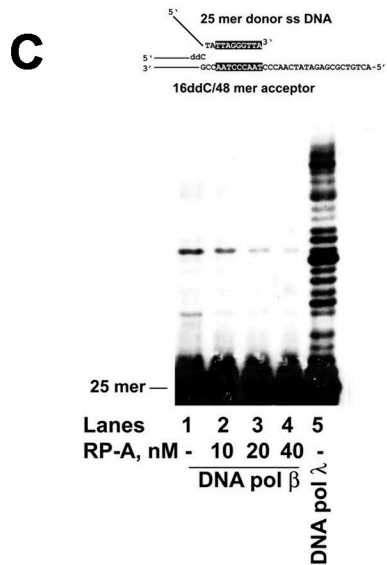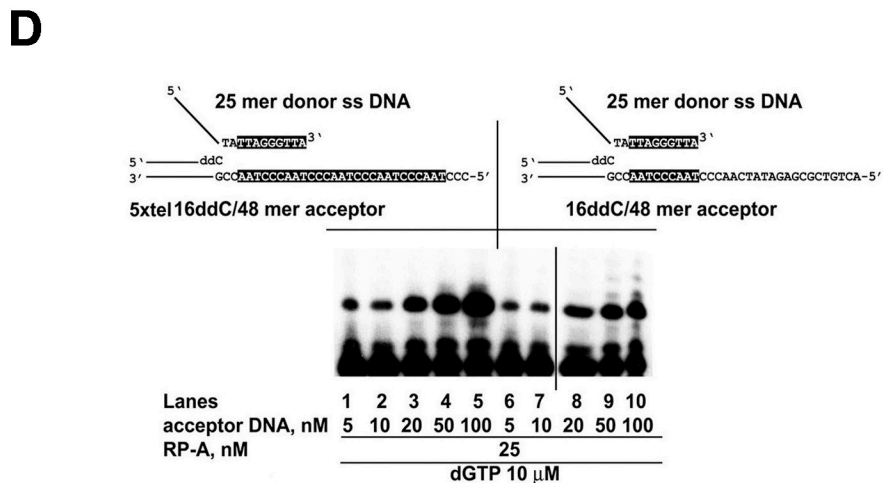

Figure S1

**A**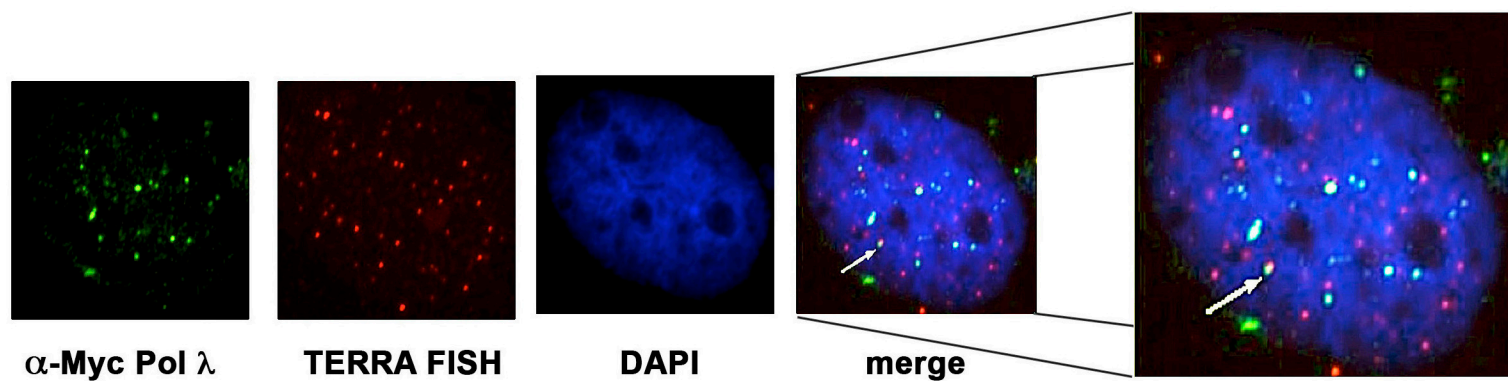

| Cells | Pol $\lambda$<br>foci<br>(tot) | TPP1<br>foci (tot) | Colocalizations<br>expected | Colocalizations<br>observed | $\chi^2$<br><i>p</i> -value |
|-------|--------------------------------|--------------------|-----------------------------|-----------------------------|-----------------------------|
| 21    | 404                            | 1056               | 4.2                         | 7                           | <i>p</i> =0.134             |

**B**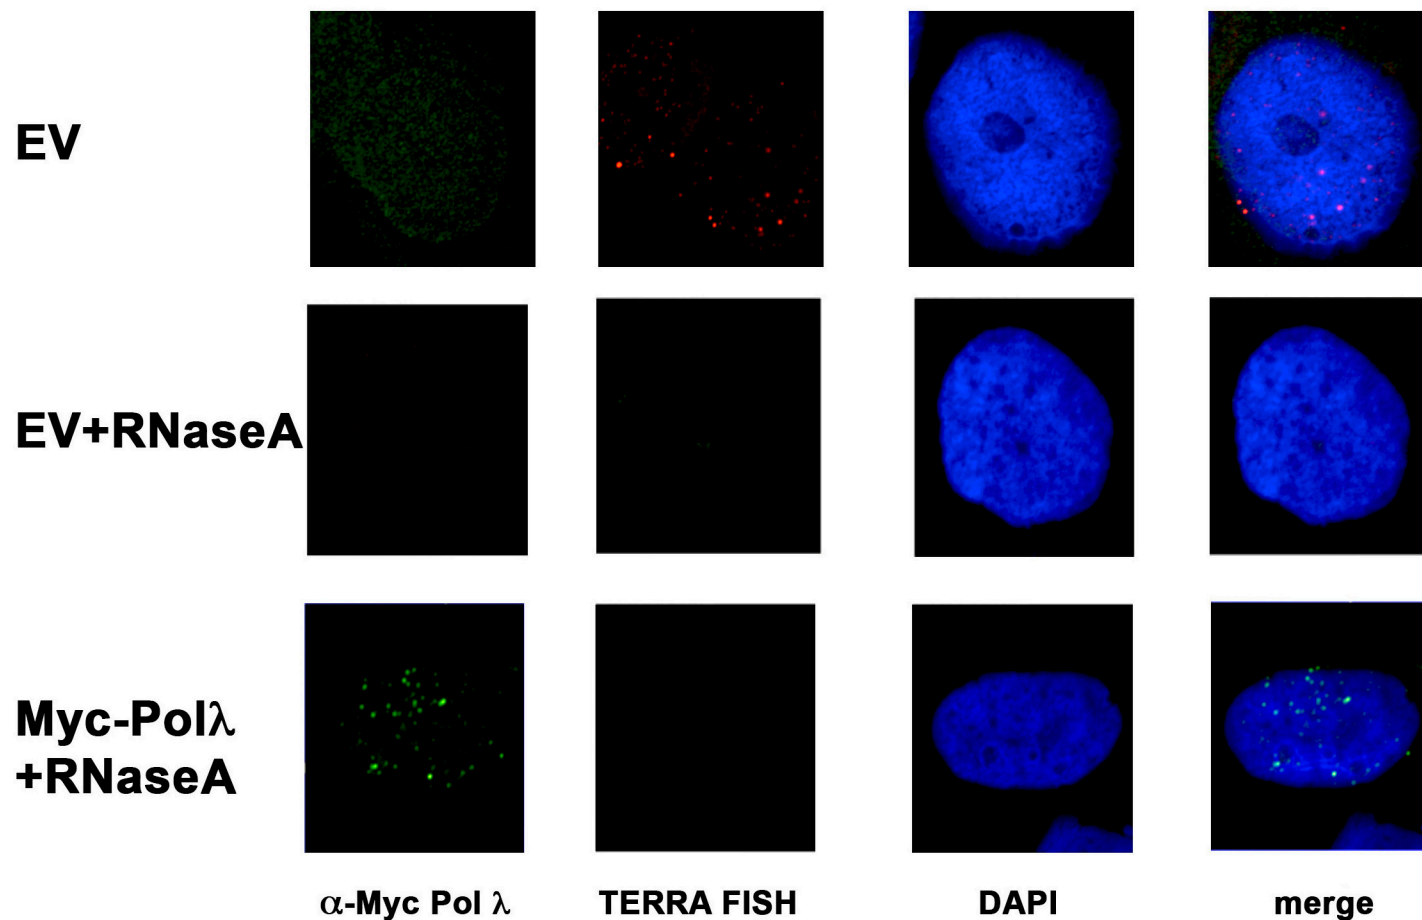

Figure S2

PoIL

|  |                 |        |               |        |
|--|-----------------|--------|---------------|--------|
|  | C               | PoILKD | C             | PoILKD |
|  | <b>BJ-hTERT</b> |        | <b>Saos-2</b> |        |

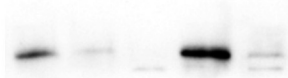

Actin

|  |                 |        |               |        |
|--|-----------------|--------|---------------|--------|
|  | C               | PoILKD | C             | PoILKD |
|  | <b>BJ-hTERT</b> |        | <b>Saos-2</b> |        |

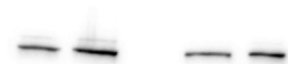

Figure S3

**Fig.1A, lanes 5-6**

**Pol L**

**C PoILKD**

**U2OS**

**Actin**

**c PoILKD**

**U2OS**

**Figure S4**

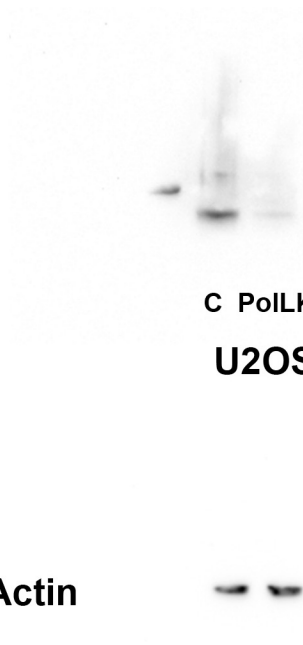

Fig.2H, lanes 1,2

22-01-19 chemidoc

U2OS

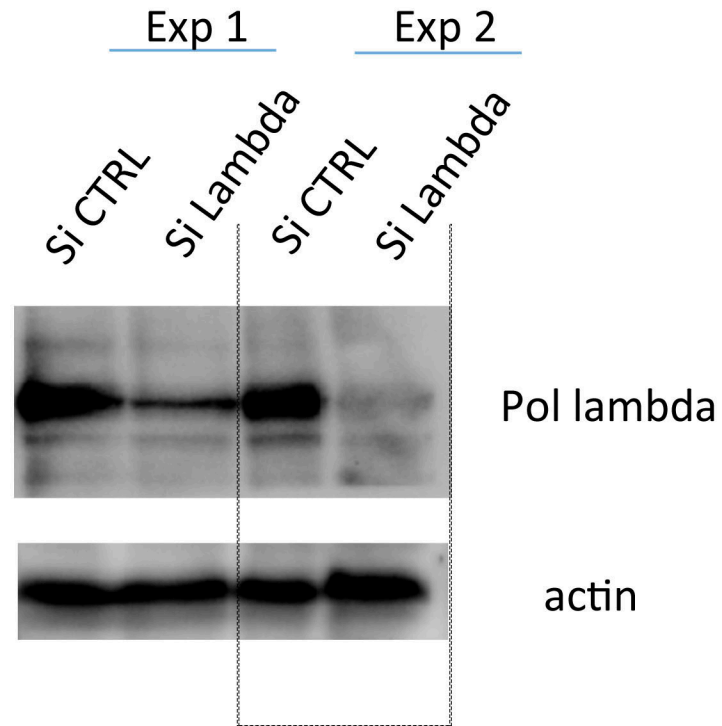

Figure S5



**Fig. 4 G lanes 1, 2-6**

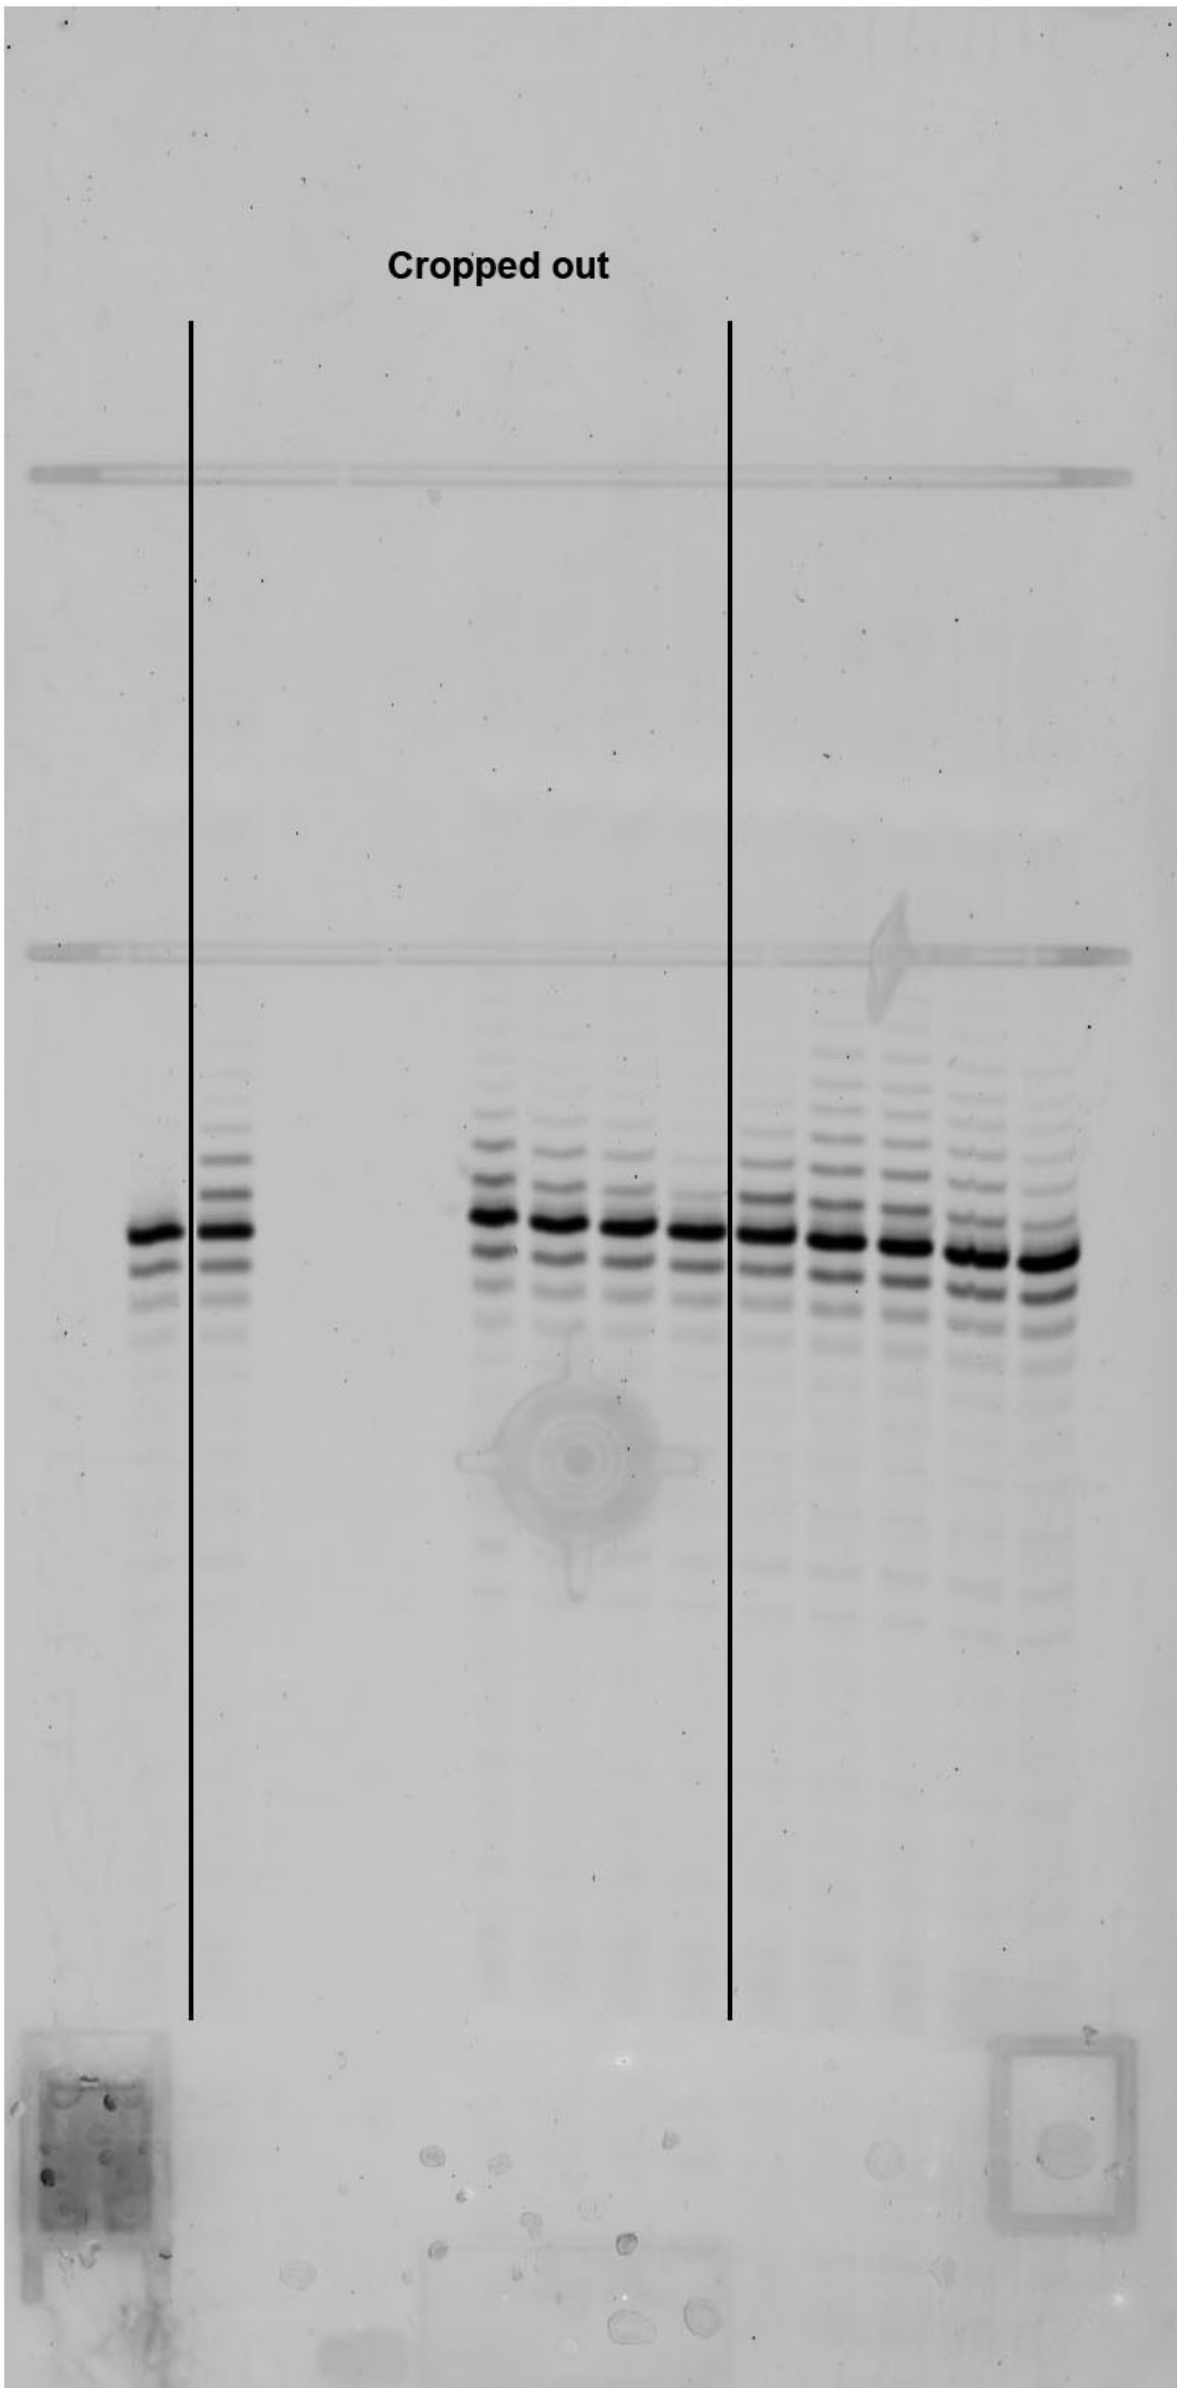

**Figure S6**

**Fig. 4H, lanes 1-8**

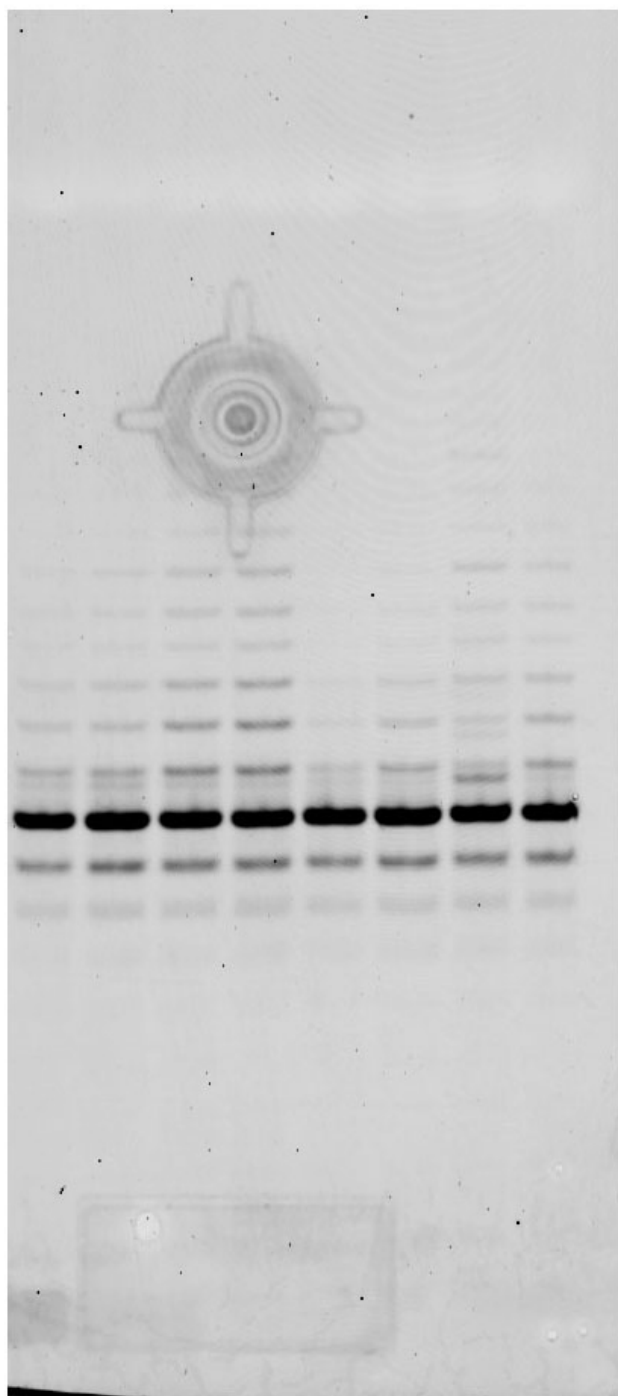

**Figure S7**

Fig 4 E

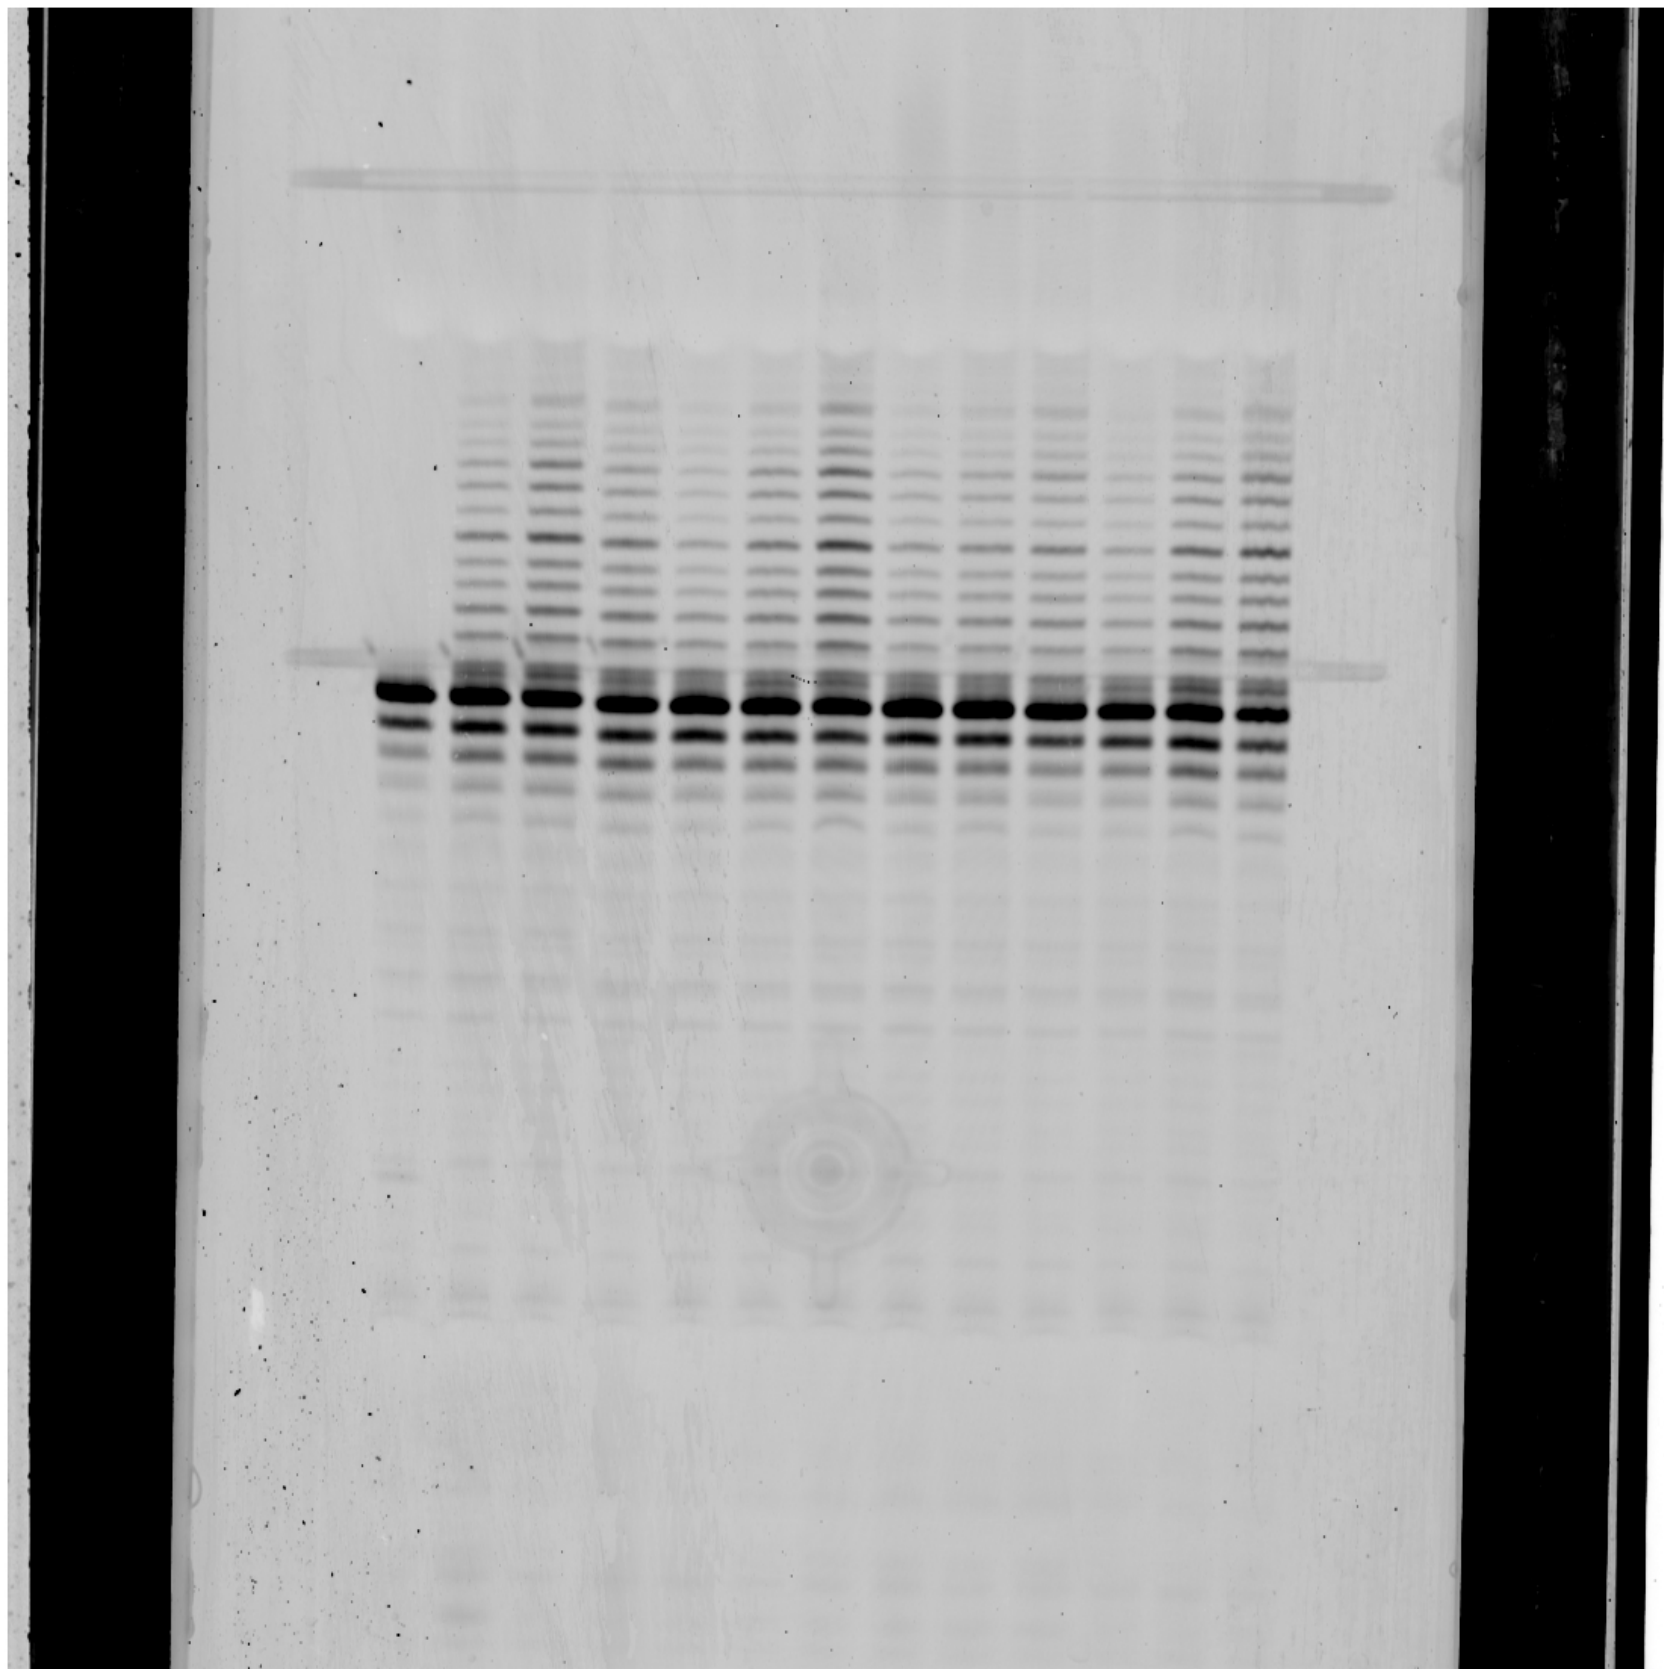

Figure S8
